# Supplementary material
Source: Springer Nature journal article supplement (https://www.springermedizin.de/resource/supplementary/13017_2013_335_MOESM1_ESM.pdf/9635996)

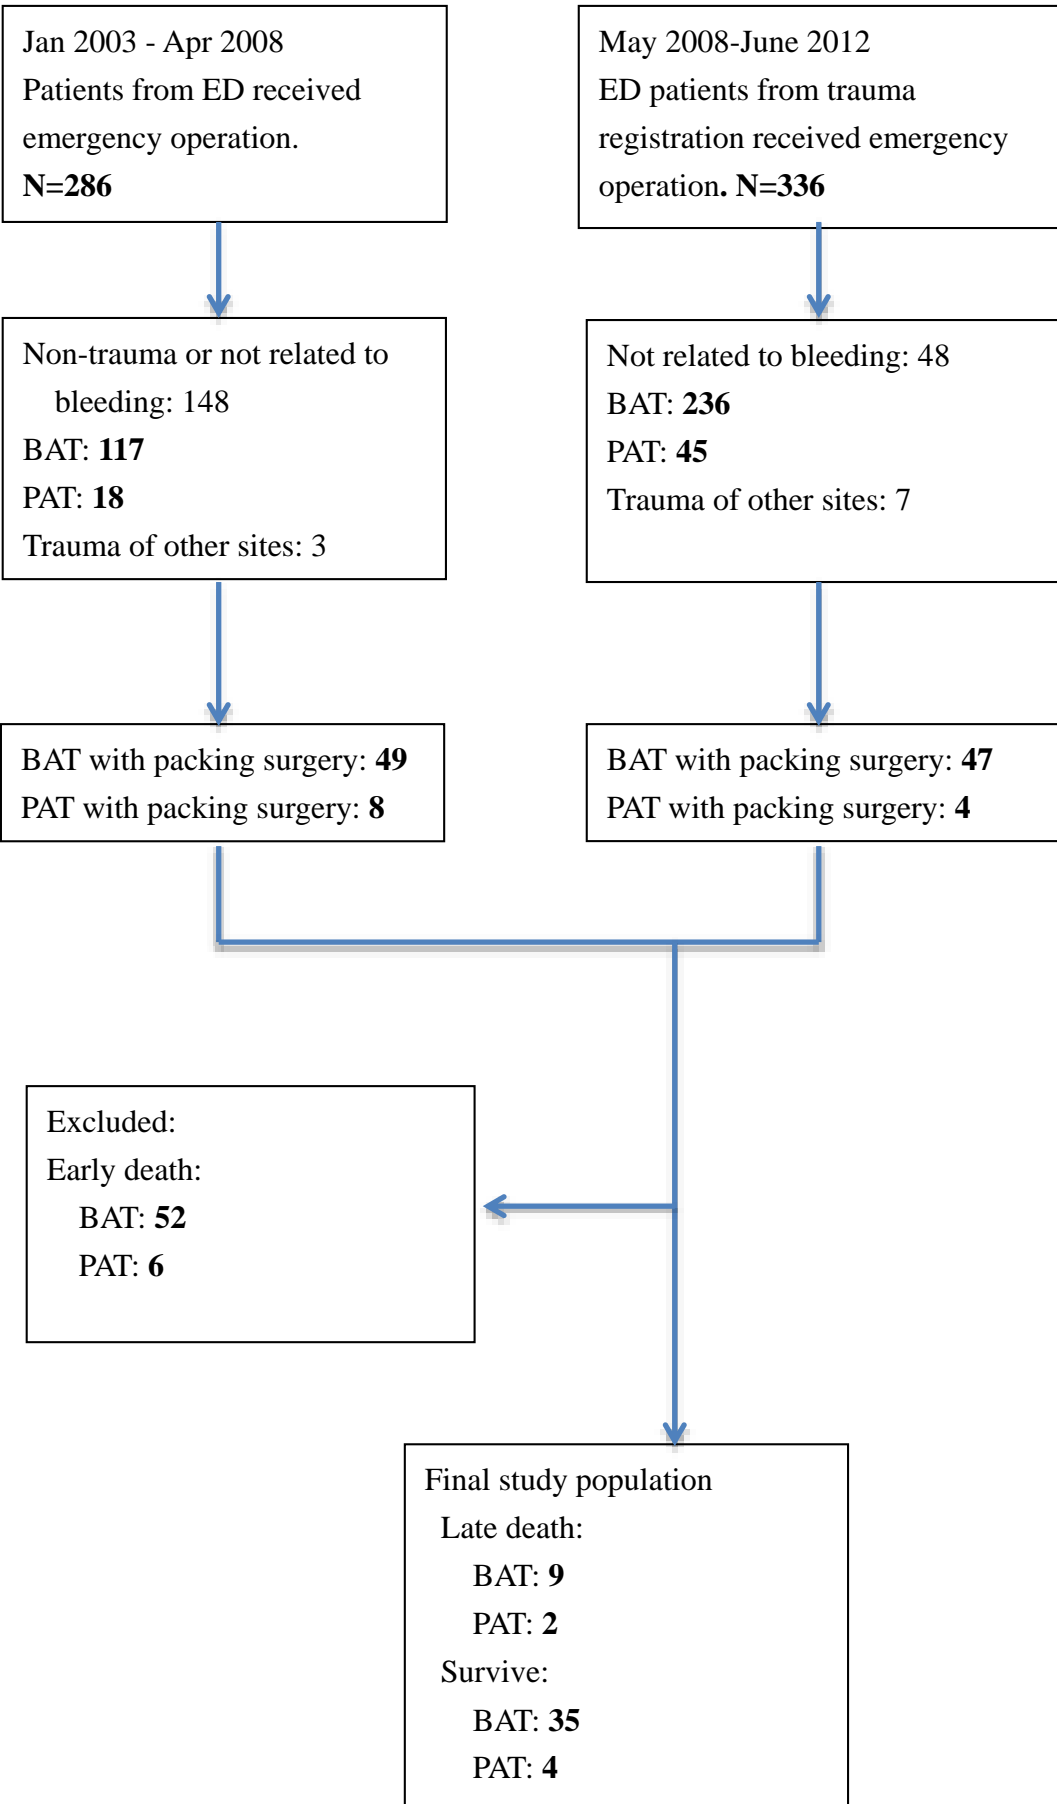

Supplement: MOESM1 [file 9635996]
